# Supplementary material for: The Honey Bee Epigenomes: Differential Methylation of Brain DNA in Queens and Workers
Source: PubMed Central journal article supplement (PMC2970541; doi:10.1371/journal.pbio.1000506), 2010-11-02

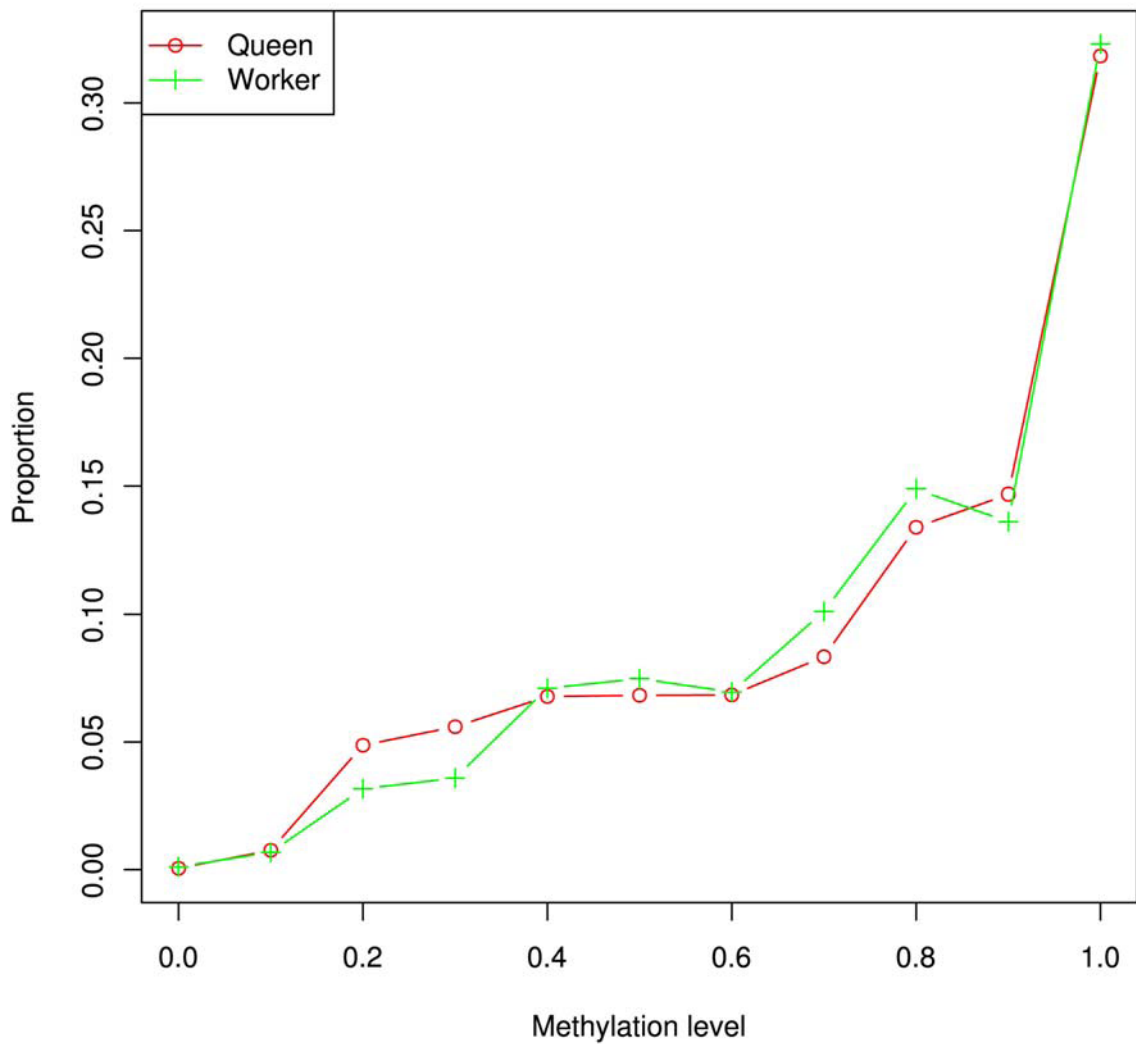

Supplement: pbio.1000506.s002.pdf [file pbio.1000506.s002.pdf]
